1 **The origin and spread of locally adaptive seasonal camouflage in snowshoe hares**

2 Matthew R. Jones<sup>1,2</sup>, L. Scott Mills<sup>3,4</sup>, Jeffrey D. Jensen<sup>2</sup>, Jeffrey M. Good<sup>1,3</sup>

3 <sup>1</sup>Division of Biological Sciences, University of Montana, Missoula, MT 59812, USA.

4 <sup>2</sup>School of Life Sciences, Arizona State University, Tempe, AZ 85281, USA

5 <sup>3</sup>Wildlife Biology Program, University of Montana, Missoula, MT 59812, USA.

6 <sup>4</sup>Office of Research and Creative Scholarship, University of Montana, Missoula, MT 59812,  
7 USA.

8 Corresponding authors: [matthew.r.jones.1@asu.edu](mailto:matthew.r.jones.1@asu.edu), [jeffrey.good@umontana.edu](mailto:jeffrey.good@umontana.edu)

## 9 **Abstract**

10 Adaptation is central to population persistence in the face of environmental change, yet we rarely  
11 precisely understand the origin and spread of adaptive variation in natural populations. Snowshoe  
12 hares (*Lepus americanus*) along the Pacific Northwest (PNW) coast have evolved brown winter  
13 camouflage through positive selection on recessive variation at the *Agouti* pigmentation gene  
14 introgressed from black-tailed jackrabbits (*L. californicus*). Here we combine new and published  
15 whole genome and exome sequences with targeted genotyping of *Agouti* in order to investigate  
16 the evolutionary history of local seasonal camouflage adaptation in the PNW. We find evidence  
17 of significantly elevated inbreeding and mutational load in coastal winter-brown hares, consistent  
18 with a recent range expansion into temperate coastal environments that incurred indirect fitness  
19 costs. The genome-wide distribution of introgression tract lengths supports a pulse of  
20 hybridization near the end of the last glacial maximum, which may have facilitated range  
21 expansion via introgression of winter-brown camouflage variation. However, signatures of a  
22 selective sweep at *Agouti* indicate a much more recent spread of winter-brown camouflage.  
23 Through simulations we show that the temporal lag between the hybrid origin and subsequent  
24 selective sweep of the recessive winter-brown allele can be largely attributed to the limits of  
25 natural selection imposed by simple allelic dominance. We argue that while hybridization during  
26 periods of environmental change may provide a critical reservoir of adaptive variation at range  
27 edges, the probability and pace of local adaptation will strongly depend on population  
28 demography and the genetic architecture of introgressed variation.

## 29 **Introduction**

30           Local adaptation is fundamental to the persistence of populations during periods of rapid  
31 environmental change. In particular, local adaptation to marginal habitats may increase a species'  
32 niche breadth and range size (Holt and Gomulkiewicz 1997), enhancing their evolutionary  
33 resilience (Sgrò et al. 2011; Slatyer et al. 2013; Forsman 2016; Mills et al. 2018). Consequently,  
34 range edges where populations encounter marginal habitats and less favorable conditions may  
35 harbor crucial adaptive variation that facilitates long-term persistence in the face of  
36 environmental change (Hampe and Petit 2005; Hill et al. 2011; Cheng et al. 2014). Yet, range  
37 boundaries may also reflect the limits of natural selection if they are defined by environments  
38 where populations have failed to adapt (Antonovics 1976; Kirkpatrick and Barton 1997; Bridle  
39 and Vines 2007). Revealing how adaptive variation arises and spreads along range edges is,  
40 therefore, fundamental to understand the limitations of adaptation to new or changing  
41 environments (Ackerly 2003; Hampe and Petit 2005). However, we rarely possess detailed  
42 knowledge of the genetic basis and history of local adaptation in natural populations.

43           Several decades of theoretical research have established a framework for predicting  
44 demographic conditions along range margins, which are crucial in shaping population-level  
45 fitness and the potential for adaptation and range expansion. Populations inhabiting marginal  
46 habitats are generally predicted to be small and occur at low densities (Antonovics 1976;  
47 Kirkpatrick and Barton 1997), resulting in relatively reduced rates of beneficial mutation and  
48 levels of standing genetic variation (Pfennig et al. 2016). Small range-edge populations may  
49 further experience higher rates of inbreeding due to genetic drift (Wright 1931; Barton 2001) and  
50 accumulate deleterious variation (i.e., mutational load; Lynch et al. 1995; Willi et al. 2018),  
51 which can decrease the probability of population persistence (Mills and Smouse 1994). Elevated

52 individual inbreeding and mutational load along range edges may also reflect past histories of  
53 adaptation and range expansion that result in non-equilibrium population dynamics. For instance,  
54 mating between close relatives may increase in founder populations that have recently undergone  
55 severe population contractions associated with range expansions (Frankham 1998). Likewise,  
56 mutational load may be amplified through the colonization of new environments because  
57 population contractions reduce the efficacy of selection against deleterious alleles at the  
58 expansion front (i.e., expansion load; Peischl et al. 2013; Henn et al. 2016; González-Martínez et  
59 al. 2017; Willi et al. 2018). Thus, when adaptation does occur along range margins it may  
60 produce negative feedbacks on population fitness and evolutionary potential.

61       Patterns of migration into range edge populations are also pivotal to their fitness and  
62 adaptive potential. Larger core populations are expected to produce relatively more migrants  
63 than smaller edge populations, leading to asymmetric rates of gene flow between core and  
64 peripheral habitats. In extreme scenarios, edge populations with low population growth rates  
65 ( $\lambda < 1$ ) can be demographic sinks that are maintained by immigration from the core of the range  
66 (Holt and Gomulkiewicz 1997; Griffin and Mills 2009). Highly asymmetric gene flow may  
67 further reduce fitness and hinder adaptation along the range edge by continually swamping local  
68 selection (Haldane 1930; Garcia-Ramos and Kirkpatrick 1997; Kirkpatrick and Barton 1997;  
69 Kawecki 2008). However, gene flow from core populations into edge populations may ultimately  
70 promote adaptive responses when edge populations are small and ecological gradients are  
71 shallow (Polechová 2018; Bontrager and Angert 2019). Hybridization between species may also  
72 facilitate adaptation and range expansion if edge populations intersect with the range of closely-  
73 related species that are adapted to local habitats (Baker 1948; Lewontin and Birch 1966; Burke  
74 and Arnold 2001; Rieseberg et al. 2007; Kawecki 2008; Pfennig et al. 2016). Introgression may

75 provide a crucial source of large-effect variation (Hedrick 2013), which is predicted to be scarce  
76 in small populations but often necessary for range-edge adaptation and expansion (Behrman and  
77 Kirkpatrick 2011; Gilbert and Whitlock 2016). Putative adaptive introgression has now been  
78 shown in numerous species (e.g., Song et al. 2011; Pardo-Diaz et al. 2012; Huerta-Sánchez et al.  
79 2014; Lamichhaney et al. 2015; Miao et al. 2016; Jones et al. 2018; Oziolor et al. 2019) and has  
80 been specifically linked to range expansions in Australian fruit flies (Lewontin and Birch 1966),  
81 sunflowers (Rieseberg et al. 2007), and mosquitoes (Besansky et al. 2003). While hybridization  
82 may facilitate adaptation and range expansion via large-effect mutations (Hedrick 2013; Nelson  
83 et al. 2019), the factors influencing the pace of adaptive introgression are often unclear.

84         Snowshoe hares (*Lepus americanus*) are broadly distributed across boreal and montane  
85 forests of North America. Most populations of hares undergo seasonal molts between brown  
86 (summer) and white (winter) coats to maintain crypsis in snow-covered environments. Seasonal  
87 camouflage is a crucial component of fitness in this system (Mills et al. 2013) as hares that  
88 become mismatched with their environment experience dramatically increased predation rates  
89 (i.e., 3-7% increase in weekly survival mortality; Zimova et al. 2016). However, some hares have  
90 adapted to mild winter environments by remaining brown in the winter (Mills et al. 2018).  
91 Brown winter camouflage in snowshoe hares is relatively rare across the entire range (<5% of  
92 the range), but predominant along portions of the southern range edge in the Pacific Northwest  
93 (PNW; Nagorsen 1983) with occurrence closely tracking regions of low seasonal snow cover  
94 (Mills et al. 2018). As snow cover across North America continues to decline under climate  
95 change, it is predicted that winter-brown camouflage may spread from the edge to the interior of  
96 the range, enhancing the evolutionary resilience of snowshoe hares (Jones et al. 2018; Mills et al.  
97 2018). We previously demonstrated that brown versus white winter camouflage in PNW

98 snowshoe hares is determined by a simple *cis*-regulatory polymorphism of the *Agouti*  
99 pigmentation gene that influences its expression during the autumn molt (Jones et al. 2018). The  
100 locally adaptive winter-brown allele is fully recessive and derived from introgressive  
101 hybridization with black-tailed jackrabbits (*Lepus californicus*), a closely-related scrub-grassland  
102 species that remains brown in the winter (Jones et al. 2018). Thus, the evolution of brown winter  
103 coats along coastal environments in the PNW represents one of the few verified cases of  
104 introgression underlying an adaptive trait of known ecological relevance in mammals (Taylor  
105 and Larson 2019).

106         The establishment of this genotype-to-phenotype link provides a powerful opportunity to  
107 examine how population history and hybridization shape local adaptation and expansion along  
108 the range edge. Here we seek to deepen our understanding of 1) the population history of PNW  
109 range edge snowshoe hares and 2) the origin and spread of winter-brown camouflage across  
110 coastal PNW environments. We first use previously published targeted exome data (61.7 Mb for  
111 80 individuals; Jones et al. 2018) to estimate historical changes in population size ( $N$ ), individual  
112 inbreeding coefficients, and mutational load in PNW hares. We then combine 11 whole genome  
113 sequences (WGS; six new and five previously published) with 61 newly assembled complete  
114 mitochondrial genomes and targeted genotyping of the introgressed *Agouti* region across 106  
115 hares to resolve the timing of hybridization with black-tailed jackrabbits and the subsequent  
116 spread of winter-brown coat color variation. We use these data to test theoretical predictions for  
117 the maintenance and spread of adaptive variation in peripheral environments. Our study provides  
118 rare empirical insight into the dynamic interplay of environmental change, hybridization, and  
119 selection along range-edge environments and its evolutionary consequences.

120

## 121 **Methods**

### 122 Genomic data generation

123 All sample collection with live animals was performed under approved state permits and  
124 associated Animal Use Protocols approved through the University of Montana Institutional  
125 Animal Care and Use Committee (IACUC).

126 For some analyses, we used previously generated targeted whole exome data (61.7-Mb  
127 spanning 213,164 intervals; ~25-Mb protein-coding exons, ~28-Mb untranslated region, ~9-Mb  
128 intronic or intergenic) for 80 snowshoe hares ( $21\times$  mean coverage) collected from Washington  
129 (WA;  $n=13$  winter-brown,  $n=13$  winter-white), Oregon (OR;  $n=13$  winter-brown,  $n=13$  winter-  
130 white), Montana (MT;  $n=14$  winter-white), and southwest British Columbia (BC;  $n=14$  winter-  
131 brown; Jones et al. 2018). Hares from OR and WA were collected in the Cascade Range where  
132 populations are polymorphic for winter coat color (Fig. 1A). Hares from Seeley Lake in western  
133 MT are winter-white individuals, while those from BC were collected in low-lying regions near  
134 the Pacific coast where snowshoe hares are all winter-brown (Fig. 1A). To infer the history of  
135 hybridization, we performed whole genome resequencing of three black-tailed jackrabbits from  
136 OR and California (CA) and two winter-brown snowshoe hares from OR and BC. These samples  
137 complement WGS data previously generated for two black-tailed jackrabbits from Nevada (NV;  
138 one of which was sequenced to higher coverage in this study) and snowshoe hares from MT,  
139 WA, Utah (UT), and Pennsylvania (PA; Jones et al. 2018). We extracted genomic DNA  
140 following the Qiagen DNeasy Blood and Tissue kit protocol (Qiagen, Valencia, CA) and  
141 prepared genomic libraries following the KAPA Hyper prep kit manufacturer's protocol. For all  
142 libraries, we sheared genomic DNA using a Covaris E220evolution ultrasonicator and performed  
143 a stringent size selection using a custom-prepared carboxyl-coated magnetic bead mix (Rohland

144 and Reich 2012) to obtain average genomic fragment sizes of 400-500 bp. We determined  
145 indexing PCR cycle number for each library with quantitative PCR (qPCR) on a Stratagene  
146 Mx3000P thermocycler (Applied Biosystems) using a DyNAmo Flash SYBR Green qPCR kit  
147 (Thermo Fisher Scientific). Final libraries were size-selected again with carboxyl-coated  
148 magnetic beads, quantified with a Qubit (Thermo Fisher Scientific), and pooled for sequencing  
149 by Novogene (Novogene Corporation Ltd.; Davis, CA) on two lanes of Illumina HiSeq4000  
150 using paired-end 150 bp reads.

151 To resolve the history of selection on the winter-brown *Agouti* allele, we performed  
152 targeted enrichment and sequencing to genotype 106 hares at the *Agouti* locus ( $n=37$  WA,  $n=64$   
153 OR,  $n=5$  MT). We developed a custom set of IDT xGen Lockdown probes spanning a 596.4 kb  
154 interval centered on the *Agouti* gene and extending to flanking regions (chromosome  
155 4:5,250,800-5,847,200; coordinates based on the European rabbit (*Oryctolagus cuniculus*)  
156 oryCun2 genome build). The probe sequences were based on a snowshoe hare pseudoreference  
157 genome (~33 $\times$ ; Jones et al. 2018) derived from iterative mapping to the rabbit genome (Carneiro  
158 et al. 2014). We targeted 96 uniquely-mapped 100 bp regions (based on low coverage WGS data  
159 from Jones et al. (2018)) that contained one or more diagnostic SNPs for winter coat color,  
160 allowing us to infer winter coat color for samples based on their *Agouti* genotype. We prepared  
161 genomic libraries for targeted *Agouti* sequencing following a modified version of Meyer and  
162 Kircher (2010), as described in Jones et al. (2018). We performed hybridization reactions on 500  
163 ng of pooled libraries (10-16 individual libraries per pool), 5  $\mu$ g of custom prepared snowshoe  
164 hare C<sub>0</sub>t-1 DNA, and 2 nM of blocking oligos. Washing and recovery of captured DNA was  
165 performed following the IDT xGen Lockdown probe hybridization capture protocol (version 2).  
166 Each capture library was then amplified in 50  $\mu$ l reactions with 1X Herculase II reaction buffer,



167 250  $\mu$ M each dNTP, 0.5  $\mu$ M each primer, 1  $\mu$ l Herculase II fusion polymerase, and 20  $\mu$ l library  
168 template. The PCR temperature profile consisted of a 45 second 98°C denaturation step,  
169 followed by 24 cycles of 98°C for 15 seconds, 60°C for 30 seconds, and 72°C for 30 seconds,  
170 with a final 72°C elongation step for 1 minute. We cleaned and size-selected final libraries with  
171 1.2X carboxyl-coated magnetic beads and verified target enrichment with qPCR. *Agouti* capture  
172 libraries were then pooled and sequenced with other libraries across two lanes of Illumina  
173 HiSeq4000 at the University of Oregon Core (Eugene, OR) and Novogene.

174

#### 175 Read processing and variant calling

176 For all raw sequence data, we trimmed adapters and low-quality bases (mean phred-scaled  
177 quality score <15 across 4 bp window) and removed reads shorter than 50 base pairs (bp) using  
178 Trimmomatic v0.35 (Bolger et al. 2014). We then merged paired-end reads overlapping more  
179 than 10 bp and with less than 10% mismatched bases using FLASH2 (Magoč and Salzberg  
180 2011). Cleaned exome and *Agouti* capture reads were mapped using default settings in BWA-  
181 MEM v0.7.12 (Li 2013) to the snowshoe hare pseudoreference genome. WGS data were mapped  
182 to either the snowshoe hare or a black-tailed jackrabbit pseudoreference, which was also created  
183 by iteratively mapping to the rabbit genome (Jones et al. 2018). We used *PicardTools* to remove  
184 duplicate reads with the MarkDuplicates function and assigned read group information with the  
185 AddOrReplaceReadGroups function. Using GATK v3.4.046 (McKenna et al. 2010), we  
186 identified poorly aligned genomic regions with RealignerTargetCreator and performed local  
187 realignments with IndelRealigner. We performed population-level multi-sample variant calling  
188 using default settings with the GATK UnifiedGenotyper and filtered variants in VCFtools  
189 v0.1.14 (Danecek et al. 2011). For whole exome and whole genome data, we filtered genotypes

190 with individual coverage  $<5\times$  or  $>70\times$  or with a phred-scaled quality score  $<30$ . Additionally, we  
191 removed all indel variants and filtered single nucleotide polymorphisms (SNPs) with a phred-  
192 scaled quality score  $<30$  and Hardy-Weinberg  $P<0.001$ . We required that sites have no missing  
193 data across individuals. For targeted *Agouti* SNP data, we additionally filtered heterozygous  
194 genotypes with allelic depth ratios  $>3$  and sites with  $> 50\%$  missing data across individuals. We  
195 phased haplotypes and imputed missing data with Beagle v4.1 (Browning and Browning 2007)  
196 and used *Haplostrips* (Marnetto and Huerta-Sánchez 2017) to visualize haplotype structure.

197

### 198 Population size history and inbreeding coefficients of PNW hares

199 We used the program  $\partial a\partial i$  (Gutenkunst et al. 2009) to infer historical population size ( $N$ )  
200 changes in PNW snowshoe hare populations (BC, MT, OR, and WA) using the folded site  
201 frequency spectrum (SFS) of synonymous variants from our extensive whole exome data set. We  
202 used the folded SFS to be consistent with statistical inferences of the distribution of fitness  
203 effects (see below). For each population, we tested a standard neutral equilibrium model, a two-  
204 epoch model (single instantaneous  $N$  change), a three-epoch model (two instantaneous  $N$   
205 changes), an exponential  $N$  growth model, and an instantaneous  $N$  change + exponential  $N$   
206 growth model. We inferred values for parameters  $\nu$ , the population size relative to ancestral  $N$   
207 ( $N_{anc}$ ; e.g.,  $\nu=1$  if  $N=N_{anc}$ ) and  $t$ , the time of population size changes in units of  $2N_{anc}$   
208 generations. We performed 100 independent runs under each model starting with parameter  
209 values sampled randomly across a uniform distribution ( $0.001<\nu<100$ ,  $0<2N_{anc}t<2$ ). For each  
210 model, we selected parameters with the highest log-likelihood value and chose the overall best  
211 model using a composite-likelihood ratio test with the Godambe Information Matrix (Coffman et  
212 al. 2016). We further checked the validity of maximum likelihood models by comparing the

213 predicted SFS to the observed SFS for each population (Fig. S2). We determined 95%  
214 confidence intervals for parameter estimates using the Godambe Information Matrix with 100  
215 bootstrap data sets comprised of one randomly selected synonymous SNP per 10 kb.

216 SFS-based approaches are often underpowered or inappropriate for inferring recent  
217 population size changes (Robinson et al. 2014; Beichman et al. 2018). For instance, even with a  
218 sufficient sample size, a historically large population that has very recently contracted in size  
219 (i.e., not in equilibrium) may nonetheless have a large variance  $N_e$ . However, individuals in such  
220 populations may exhibit elevated individual inbreeding coefficients ( $F_{IS}$ ), calculated as  $1-H_o/H_e$   
221 where  $H_o$  is the observed heterozygosity and  $H_e$  is expected heterozygosity assuming random  
222 mating. To examine evidence for recent population contractions, we calculated the mean of the  
223 individual inbreeding coefficient ( $F_{IS}$ ) for each population using VCFtools and tested for  
224 significant differences between populations with a two-tailed Student's t-Tests in R (R Core  
225 Team 2018).

226

### 227 Mutational load and the distribution of fitness effects

228 For each PNW population, we measured the proportion of homozygosity across SNPs with  
229 predicted phenotypic effects (nonsynonymous and nonsense) as an indicator for relative  
230 differences in mutational load under a recessive deleterious mutation model (González-Martínez  
231 et al. 2017). We tested for significant differences in the proportion of homozygosity across  
232 populations using two-sided Z-tests for proportions in R (R Core Team 2018). Additionally, we  
233 used whole exome data to infer the distribution of selection coefficients of segregating variation,  
234 more commonly referred to as the distribution of fitness effects (DFE). In principle, we can infer  
235 the DFE from the SFS of selected sites because neutral, weakly deleterious, and strongly

236 deleterious variation should segregate at different frequencies in populations (Keightley and  
237 Eyre-Walker 2010). The DFE of segregating variation is commonly inferred by first fitting a  
238 population history model to the SFS of neutral sites (often synonymous SNPs) and then fitting a  
239 mutational model to the SFS of selected sites (often nonsynonymous SNPs), while controlling  
240 for the effect of population history (i.e., changes in  $N$ ) on the SFS of selected sites (Keightley  
241 and Eyre-Walker 2010). Here we implement this approach using the *Fit∂a∂i* module (Kim et al.  
242 2017). We used the maximum likelihood parameter values from our inferred demographic model  
243 to control for population history and fit a simple DFE to the folded SFS of nonsynonymous  
244 variants (identified with SNPeff; Cingolani et al. 2012) described by a gamma distribution of  
245 selective effects with a shape ( $\alpha$ ) and scale ( $\beta$ ) parameter. To estimate variance in shape and  
246 scale parameters, we used 100 bootstrap datasets randomly sampling 50% of nonsynonymous  
247 sites and performed 10 independent runs on each dataset. We used random starting values  
248 between 0.001 and 1 for the shape parameter and values between 0.01 and 200,000 for the scale  
249 parameter. To scale the DFE from relative selection coefficients ( $2N_{anc}s$ ) to absolute selection  
250 coefficients ( $s$ ), we divided the scale parameter by  $2N_{anc}$  (Kim et al. 2017).

251

### 252 The timing of hybridization

253 If hybridization between snowshoe hares and black-tailed jackrabbits is rare, then the age of  
254 hybridization may also reflect the age of *Agouti* introgression. We used two complementary  
255 approaches to estimate the timing of hybridization between PNW snowshoe hares and black-  
256 tailed jackrabbits. Previous phylogenetic analysis of partial cytochrome *b* sequences revealed  
257 that some PNW snowshoe hares carry introgressed mitochondrial DNA (mtDNA) genomes  
258 derived from hybridization with black-tailed jackrabbits (Cheng et al. 2014; Melo-Ferreira et al.

259 2014). We estimated the age of mtDNA introgression using complete mtDNA genomes for  
260 snowshoe hares ( $n=56$ ) and black-tailed jackrabbits ( $n=5$ ) that we assembled *de novo* from newly  
261 and previously generated WGS data (Jones et al. 2018) with the program NOVOPlasty  
262 (Dierckxsens et al. 2017). We aligned individual mtDNA assemblies, including the rabbit  
263 mtDNA reference as an outgroup (total assembled length= 16,251 bp), using default settings in  
264 Clustal W v2.1 (Larkin et al. 2007) and visually verified alignment quality. We then estimated a  
265 maximum clade credibility tree and node ages with a Calibrated Yule model in BEAST 2  
266 (Bouckaert et al. 2014), assuming a strict molecular clock and an HKY substitution model using  
267 empirical base frequencies. We specified default priors for the kappa and gamma shape  
268 parameters and used a gamma distribution ( $\alpha=0.001$ ,  $\beta=1000$ ) as a prior for the clock rate  
269 and birth rate parameter. We ran the MCMC for 5 million steps and calibrated divergence times  
270 using a log-normal distribution for the rabbit-*Lepus* node age with a median of 11.8 million  
271 generations (95% prior density: 9.8–14.3; Matthee et al. 2004).

272 We also examined patterns of autosomal introgression tracts to infer the age of nuclear  
273 admixture. Given that mtDNA admixture may have been relatively ancient (Melo-Ferreira et al.  
274 2014), admixture dating approaches based on linkage disequilibrium (LD) may have low power  
275 due to erosion of LD through ongoing recombination (Loh et al. 2013). Therefore, we developed  
276 an approach to fit the distribution of empirically inferred introgression tract lengths to tract  
277 lengths simulated under various models of admixture. We first identified genome-wide tracts of  
278 introgression using the program PhylonetHMM (Liu et al. 2014), which assigns one of two  
279 parent trees (species tree or hybridization tree) to each variable position using a hidden Markov  
280 model. PhylonetHMM robustly distinguishes between incomplete lineage sorting (ILS) and  
281 introgression by allowing for switches between gene trees within each parent tree (Liu et al.

282 2014; Schumer et al. 2016). Alignments of WGS data for the phylogenetic analysis included two  
283 black-tailed jackrabbits sampled from CA (BTJR1) and NV (BTJR2), a UT snowshoe hare  
284 (previously shown as non-admixed; Jones et al. 2018), and a winter-brown WA snowshoe hare to  
285 represent the admixed PNW snowshoe hare population. Here, the species tree is defined as  
286 ((WA,UT),(BTJR1, BTJR2)) and the hybridization tree is defined as (UT,(WA,BTJR1/BTJR2)).  
287 We specified base frequencies and transmission/transversion rates based on analysis with  
288 RAxML. We identified introgression tracts as contiguous regions of the genome with an average  
289 hybridization tree probability >95% across 25 variant windows (1 variant step) and excluded  
290 introgression tracts shorter than 10-kb (Schumer et al. 2016). We then used the program SELAM  
291 (Corbett-Detig and Jones 2016) to simulate a single pulse of admixture (lasting either 1  
292 generation or 100 generations) occurring at a frequency of 0.01%, 0.1%, or 1% and recorded  
293 introgression tracts >10kb every 1000 generations for 50,000 generations across 21 autosomes.  
294 We performed a goodness of fit test between empirical and simulated tract length distributions  
295 using Kolmogorov-Smirnov tests (K-S tests), which measure differences in the cumulative  
296 fraction of data across the range of observed values (Massey 1951). To estimate the variance in  
297 hybridization timing, we performed K-S tests on 100 bootstrap data sets generated by  
298 subsampling 30% of the genome-wide introgression tracts.

299

### 300 The time to most recent common ancestor of the winter-brown haplotype

301 To understand the history of the spread of winter brown camouflage, we used targeted *Agouti*  
302 SNPs to estimate the time to most recent common ancestor (TMRCA) for the winter-brown  
303 *Agouti* haplotype in OR ( $n=47$  individuals) and WA ( $n=35$  individuals). We estimated the  
304 TMRCA using a Markov chain Monte Carlo approach implemented in *startmrca* (Smith et al.

305 2018), which leverages information on the length distribution of the fixed selected haplotype and  
306 the accumulation of derived mutations. We assumed a constant recombination rate of 1 cM/Mb  
307 (Carneiro et al. 2011) and tested an upper and lower estimate for mutation rate in European  
308 rabbit ( $2.02 \times 10^{-9}$  and  $2.35 \times 10^{-9}$  mutations/site/generation; Carneiro et al. 2012). We also  
309 explored the influence of using a divergent population (homozygous winter-white individuals  
310 from MT;  $n=5$  individuals) or a local population (homozygous winter-white individuals from OR  
311 and WA;  $n=19$  individuals) to represent the ancestral winter-white haplotype (Smith et al. 2018).  
312 We assumed chr4:5480355 (in oryCun2 coordinates) as the site of the “selected allele”, which  
313 lies in the center of the association interval between two strong candidate insertion-deletion  
314 mutations in the 5' *cis*-regulatory region of *Agouti* and is perfectly correlated with winter coat  
315 color (Jones et al. 2018). We performed 100,000 iterations with a standard deviation of 20 for the  
316 proposal distribution and used the final 10,000 iterations to generate posterior TMRCA  
317 distributions (Smith et al. 2018).

318

### 319 Simulations of selection on a recessive beneficial allele

320 Assuming fixation of a single haplotype, the above framework for inferring the TMRCA should  
321 reflect the age at which the beneficial haplotype began to increase rapidly in frequency (Smith et  
322 al. 2018), which under some conditions may be much more recent than the age of the beneficial  
323 mutation itself (Teshima and Przeworski 2006; Kelley 2012). For instance, the masking of  
324 recessive alleles to selection at low frequency is expected to decrease the rate at which they  
325 begin to increase in frequency, conditional on fixation (Teshima and Przeworski 2006),  
326 potentially resulting in a temporal lag between a fixed allele's origin and TMRCA. However,  
327 such a scenario may be unlikely as the masking of rare recessive alleles is also expected to

328 decrease their fixation probability (i.e., ‘Haldane’s sieve’, Haldane 1924; Turner 1981).  
329 Alternatively, an environmental change could favor a previously neutral or deleterious variant,  
330 resulting in a delayed spread of a segregating mutation. Indeed, Orr and Betancourt (2001)  
331 demonstrated that the bias against fixation of recessive alleles disappears when positive selection  
332 acts on pre-existing variation in mutation-selection balance. We used simulations to test whether  
333 different estimates of the timing of hybridization (i.e., the origin of the winter-brown haplotype)  
334 and TMRCA of the winter-brown allele could be due to the masking of recessive alleles at low  
335 frequency. Using SLiM 3.1 (Haller and Messer 2019), we simulated an equilibrium population  
336 ( $N_e=257219$  for OR population; Table 1) experiencing positive selection on a recessive allele  
337 ( $s=0.026$ , which reflects our updated median estimate of  $s$  for winter-brown haplotype in OR;  
338 Jones et al. 2018). At the beginning of the simulations, the recessive allele was introduced at a  
339 rate of 0.01% or 0.1% per generation for 1 or 100 generations, which reflects various rates and  
340 durations of hybridization. Under each hybridization scenario, we performed 100 simulations  
341 and tracked the frequency of the recessive allele every generation, conditioning on fixation. We  
342 saved tree sequences (Haller et al. 2019) and analyzed them using *msprime* (Kelleher et al. 2016)  
343 to identify the TMCRA for fixed beneficial alleles and determine whether selection resulted in  
344 fixation of a single copy (hard sweep) or multiple copies (soft sweep) of the beneficial allele.

345

## 346 **Results**

### 347 Range-edge population history and mutational load

348 We found support for a single relatively strong  $N$  contraction (i.e., a two-epoch model) occurring  
349 ~24-100 kya in OR, WA, and BC hares (Table 1, Fig. S2). In contrast, the history of the MT  
350 population was characterized by an instantaneous + exponential  $N$  change model, in which the



351 population experienced a sudden  $17\times$  expansion  $\sim 129$  kya followed by a gradual reduction to  
352  $\sim 53\%$  of  $N_{anc}$ . Despite population contractions, estimates of contemporary  $N_e$  across all  
353 populations were relatively large (161654-257219; Table 1).

354         Using the same exome data set, we previously estimated the joint SFS for pairs of  
355 snowshoe hare populations to infer histories of population split times, migration rates, and  
356 effective population size in  $\partial a \partial i$  (Jones et al. 2018). These pairwise models supported histories  
357 of high symmetrical migration rates between populations and  $N$  contractions following  
358 population splits, but generated significantly smaller estimates of contemporary  $N_e$  compared to  
359 the new estimates that we report in Table 1. However, we made a scaling error while estimating  
360  $\theta (= 4N_e\mu)$  under these previous models. This error affected our previously reported  
361 demographic parameter estimates for snowshoe hares (Table S9 in Jones et al. 2018) and  
362 associated selection coefficient parameter estimates (e.g., previous mean  $s_{WA}=0.024$ ,  $s_{OR}=0.015$ ;  
363 updated mean  $s_{WA}=0.049$ ,  $s_{OR}=0.027$ ; Durrett and Schweinsberg 2005; Jones et al. 2018), but not  
364 the main inference of introgression at *Agouti* underlying the genetic basis of polymorphic coat  
365 color in snowshoe hares. After scaling parameter values to the correct value of  $\theta$  and excluding  
366 models beyond *a priori* divergence time parameter bounds ( $>500$  thousand years), we found that  
367 our maximum likelihood demographic model (reported here in Table S1) still includes high  
368 migration rates between populations ( $\sim 1$ -2.63 migrants per generation), but with appreciably  
369 larger  $N_e$  estimates than we previously reported and that are comparable to our new estimates  
370 (Table 1).

371         We found significantly elevated  $F_{IS}$  in the coastal BC population compared to the other  
372 three PNW populations ( $p < 0.01$ ; Fig. 1B), which combined with our previous inference of  
373 elevated LD in this population (Jones et al. 2018) could suggest recent inbreeding and population

374 size reduction. We further found a significantly higher proportion of homozygosity for  
375 synonymous, nonsynonymous, and nonsense SNPs in BC relative to other populations (Fig. 1C),  
376 which suggests elevated mutational load in BC under a recessive deleterious mutation model. BC  
377 individuals also have a significantly higher proportion of strongly deleterious nonsynonymous  
378 variants in (27.7%;  $|s| \geq 10^{-3}$ ) relative to other populations (0.8-3.2%; Fig. 1D, Table S2). Because  
379 we have the same sample size for MT and BC ( $n=14$  individuals) this striking difference in the  
380 DFE is likely not the result of the small BC sample size, which can lead to overestimation of the  
381 proportion of strongly deleterious variation (Kim et al. 2017). Notably, if synonymous SNPs  
382 used for demographic inference experience direct or linked selection (e.g., Akashi 1994;  
383 Stoletzki and Eyre-Walker 2006; Resch et al. 2007; Pouyet et al. 2018), then our demographic  
384 model could be misinferred (Ewing and Jensen 2016) in such a way that we will underestimate  
385 the strength of purifying selection on non-synonymous SNPs. Regardless, assuming levels of  
386 linked selection are similar across populations, the relative differences we observe in the DFE  
387 are unlikely driven by weak or linked selection on synonymous variants.

388

### 389 The history of hybridization and introgression

390 From our complete mtDNA assemblies, we estimated a divergence time of 3.299 million  
391 generations ago (95% HPD interval: 2.555-4.255 million generations ago; Fig. 2) between black-  
392 tailed jackrabbit and non-introgressed snowshoe hares, which is consistent with previous  
393 estimates of species' split times (Matthee et al. 2004; Melo-Ferreira et al. 2014; Jones et al.  
394 2018). Within the non-introgressed snowshoe hare mtDNA clade, we found a relatively deep  
395 split between the UT snowshoe hare (representing the 'Rockies' cluster identified by Cheng et al.

396 2014) and all other snowshoe hares (641 thousand generations ago, 95% HPD interval: 476-834  
397 thousand generations ago; Fig. 2).

398 A significant portion of snowshoe hares from the PNW (100% of OR hares and 50% of  
399 WA hares) formed a reciprocally monophyletic clade relative to black-tailed jackrabbits (100%  
400 posterior node support; Fig. 2). As previously demonstrated through coalescent simulations  
401 (Melo-Ferreira et al. 2014), this phylogenetic pattern cannot be plausibly explained by ILS and is  
402 consistent with asymmetric introgression of black-tailed jackrabbit mtDNA into snowshoe hares.  
403 As expected, mtDNA was not associated with winter coat color in the PNW polymorphic zone  
404 (chi-squared  $P=1$ ). However, if we assume that hybridization is rare then mtDNA may track the  
405 same hybridization event that introduced winter-brown *Agouti* variation into PNW hares. The  
406 estimated split time between black-tailed jackrabbit and introgressed PNW hare mtDNA  
407 sequences was 516 thousand generations ago (95% HPD interval: 381-668 thousand generations  
408 ago, Fig. 2). However, this split time does not account for segregating ancestral polymorphism  
409 (Arbogast et al. 2002) or unsampled mtDNA variation within black-tailed jackrabbits. If we  
410 assume extant variation in snowshoe hares represents a single mtDNA introgression event, then  
411 the TMRCA of introgressed PNW snowshoe hare variation suggests a more recent date of  
412 mtDNA introgression of ~228 thousand generations ago (95% HPD interval: 168-301 thousand  
413 generations ago).

414 Our previous work revealed elevated signatures of genome-wide nuclear admixture  
415 presumably coincident with introgression of seasonal camouflage variation (Jones et al. 2018).  
416 Here we identified 1878 individual introgression tracts (median length = 28,940 bp),  
417 encompassing ~1.99% of the genome (Fig. 3). Across various simulated hybridization scenarios,  
418 the most strongly supported age of hybridization was 7-9 thousand generations ago with ranges

419 of 95% confidence intervals spanning 6-10.5 thousand generations ago (Fig. S4). Different rates  
420 of admixture or admixture pulse lengths appeared to have little effect on the inferred  
421 hybridization age or the overall fit to empirical data (Fig. S4). Furthermore, we observed poor  
422 model fitting for very recent hybridization (< 5 thousand generations ago).

423

#### 424 Positive selection for winter-brown camouflage

425 We identified the *Agouti* region as one of the longest (209,012 bp) and most highly supported  
426 introgression tracts (mean introgression probability=0.99) in the WA winter-brown hare (Fig. 4).  
427 To understand the history of positive selection on brown winter camouflage, we estimated the  
428 TMRCA of the selected winter-brown *Agouti* haplotype in snowshoe hares using targeted  
429 sequencing across the *Agouti* region (mean coverage per interval  $34\times \pm 17\times$ ). Using a divergent  
430 population, a local population, or both to represent the ancestral haplotype had little effect on  
431 TMRCA estimates (Table S3), so here we present estimates using both populations. Under a low  
432 or high estimate of the rabbit mutation rate, we inferred a TMRCA of approximately 1278  
433 generations (95% CI: 1135-1441 generations) or 1226 generations (95% CI: 1054-1408  
434 generations) for the winter-brown OR haplotype and approximately 1392 generations (95% CI:  
435 1153-1607 generations) or 972 generations (95% CI: 766-1169 generations) for the WA  
436 haplotype, respectively (Table S3). We observed no consistent allelic differences between the  
437 fixed haplotypes in WA and OR (Fig. 4), consistent with a hard selective sweep.

438 Haplotype-based methods are known to underestimate the TMRCA and accounting for  
439 this systematic error produces TMRCA estimates of approximately 2-4 thousand generations (for  
440 a fully recessive allele,  $\log_2(\text{estimate}/\text{true})\approx -1.5$ ; Kelley 2012) for the winter-brown haplotype in  
441 OR and WA. If our estimates are accurate, then there appears to be a ~3-8 thousand generation

442 lag between the origin of the winter-brown haplotype in snowshoe hares (i.e., the inferred  
443 hybridization date ~ 7-9 thousand generations ago) and the increase in frequency of the winter-  
444 brown haplotype in the PNW from a single copy. Simulations show that such temporal lags are  
445 expected for selection on recessive variation, however the duration of this lag (and the total  
446 sojourn time) is negatively associated with the hybridization rate and fixation probability, as  
447 expected (Table 2). For instance, under the lowest hybridization rate (0.01% for 1 generation) the  
448 mean lag time was 2140 generations (95% CI: 101-8322 generation) with only a 0.8% fixation  
449 probability and under the highest hybridization rate (0.1% for 100 generations) the mean lag time  
450 was only 625 generations but with 100% fixation probability. Conditional on fixation, increased  
451 hybridization rates also tended to be more often associated with soft rather than hard sweeps  
452 (e.g., 38% hard sweeps for 0.1% hybridization rate for 100 generations versus 98% hard sweeps  
453 for 0.01% hybridization rate for 1 generation). However, under intermediate hybridization  
454 scenarios (0.1% for 1 generation or 0.01% for 100 generations), we observed relatively long  
455 mean lag times (2514 and 1587 generations, respectively) associated with high probabilities of  
456 fixation (12% and 79%, respectively), often through hard selective sweeps (81% and 96%; Table  
457 2).

458

## 459 **Discussion**

460 Range-edge adaptation may enhance a species' evolutionary resilience to environmental change  
461 (Hampe and Petit 2005; Hill et al. 2011), however rigorous population genetic evaluations of  
462 predictions for range-edge demography and adaptation are limited (Bridle and Vines 2007). In  
463 snowshoe hares, the evolution of brown winter coats in temperate climates along the PNW coast  
464 represents the clearest example of local phenotypic adaptation in this wide-ranging species.

465 Given its direct link to reduced snow cover, the evolution of brown winter camouflage may  
466 further foster persistence of snowshoe hares in the face of climate change (Mills et al. 2018).  
467 Here we leveraged our understanding of the genetic basis of brown winter camouflage to  
468 examine the history of range-edge adaptation, lending insights into the potential for rapid  
469 adaptation following environmental change.

470

#### 471 Population history and mutational load at the range edge

472 Populations along range margins are predicted to be small, limiting their ability to adapt to local  
473 conditions (although see Moeller et al. 2011; Gaignic et al. 2018). Although we cannot assess  
474 relative differences in  $N_e$  across the entire hare range, we uncovered high  $N_e$  estimates across  
475 PNW populations (161654-257219; Table 1), despite evidence for strong ancient population size  
476 reductions. However, our  $N_e$  estimates derive from predictions of genetic drift (i.e., variance  $N_e$ )  
477 over long evolutionary time scales and may be a weak reflection of current census sizes,  
478 especially if local populations experience migration (Wang and Whitlock 2003) or have  
479 undergone recent size changes that are undetectable with the SFS (Beichman et al. 2018). We  
480 found evidence of significantly higher inbreeding coefficients and mutational load in coastal  
481 (BC) populations relative to the inland and montane populations (Fig. 1), signatures that are  
482 indicative of a recent population size reduction (Peischl et al. 2013, 2015; Bosshard et al. 2017;  
483 Gilbert et al. 2018). Elevated  $F_{IS}$  and LD (Fig. S1 in Jones et al. 2018) could instead be related to  
484 cryptic population substructure (i.e., the Wahlund effect; Waples 2015). However, we have  
485 found no evidence for substructure or admixture in BC that could produce this effect (Jones et al.  
486 in prep). Similar signatures of elevated mutational load (e.g., homozygosity for deleterious  
487 alleles) have been found in other range-front populations, including the plant *Mercurialis annua*

488 (González-Martínez et al. 2017) and in human populations that migrated out of Africa (Henn et  
489 al. 2016, although see Simons and Sella 2016). Thus, an intriguing potential explanation for  
490 these patterns is that they reflect signatures of a founder event associated with a recent range  
491 expansion. Moreover, given that we observe these signatures in the coastal winter-brown  
492 population, it is possible that this expansion was enabled by the evolution of locally adaptive  
493 brown winter camouflage. Winter-white hares experience heavy predation when mismatched  
494 (Zimova et al. 2016) and are not known to occur in low-lying coastal regional west of the  
495 Cascade Range (Nagorsen 1983; Mills et al. 2018), suggesting that coastal environments with  
496 ephemeral snow cover were likely unoccupied prior to local camouflage adaptation.

497         Long-term persistence of populations under environmental change ultimately requires  
498 adaptive evolution and the ability to colonize novel environments. If the colonization of coastal  
499 PNW environments by snowshoe hares was enabled by the evolution of brown winter coats, our  
500 results underscore that local adaptation to new environments can act as a negative feedback on  
501 fitness through the accumulation of deleterious mutations (Pujol and Pannell 2008; Gilbert et al.  
502 2017; González-Martínez et al. 2017; Stewart et al. 2017; Willi et al. 2018). Although the  
503 consequences of mutational load for the persistence of PNW hare populations is unclear, high  
504 recessive mutational load may compromise the adaptive potential of populations (Assaf et al.  
505 2015; González-Martínez et al. 2017) and increase the probability of extinction in small  
506 populations (Mills and Smouse 1994; Frankham 1998). In experiments of isolated *Tribolium*  
507 populations, short-term fitness gains via adaptive evolution were entirely lost over longer time  
508 periods as a consequence of increasing mutational load, although fitness could be readily  
509 restored through admixture (Stewart et al. 2017). In snowshoe hares, the potential fitness costs  
510 linked to mutational load may be mitigated by high gene flow between populations (Table S1) or

511 superseded by the enhanced species-level evolutionary resilience afforded by brown-winter  
512 camouflage during periods of declining snow cover. Regardless, we suggest that any  
513 conservation efforts to promote adaptation to climate change should weigh the potential for  
514 enhanced long-term population persistence against the potential short-term fitness costs that may  
515 arise through mutational load.

516

### 517 Hybridization and the origin of the winter-brown allele

518 Hybridization may play an important role shaping adaptation and expansion of range-edge  
519 populations (Pfennig et al. 2016), but evidence for this mode of adaptation stems from only a  
520 handful of examples (e.g., flies, Lewontin and Birch 1966; mosquitoes, Besansky et al. 2003;  
521 sunflowers, Rieseberg et al. 2007). In snowshoe hares, range and niche expansion into mild  
522 PNW coastal environments appears to have been enabled by adaptive introgression, although the  
523 history of hybridization has remained unclear. We estimated that mtDNA introgression in PNW  
524 snowshoe hares occurred ~228 thousand generations ago, which could be interpreted as a  
525 conservative upper-bound for the timing of hybridization with black-tailed jackrabbits.

526 Meanwhile, the genome-wide distribution of introgression tract lengths, which should be less  
527 sensitive to ILS and population structure within hares (Liu et al. 2014), suggest a much more  
528 recent pulse of hybridization ~7-9 thousand generations ago (Fig. 3, Fig. S5). The different  
529 genome-wide and mtDNA estimates may also reflect independent pulses of ancient  
530 hybridization. Severe systematic overestimation of divergence dates may be common with  
531 mtDNA genomes calibrated with a relatively divergent outgroup because of high mutation rates  
532 and substitution saturation (Zheng et al. 2011). The divergence dates among major snowshoe  
533 hare mtDNA lineages also appear much deeper than our best estimates derived from population



534 (nuclear) genomic data (~2-3 fold deeper, unpublished data), which suggests that our analyses  
535 based on mtDNA likely overestimate the timing of introgression. We assumed a relatively simple  
536 molecular clock model and more complicated models (e.g., relaxed clocks) might better account  
537 for mutational processes observed in mtDNA genomes. However, it would seem that there would  
538 be little insight to be gained by additional modeling here given the myriad of limitations  
539 associated with extrapolating population history from a single stochastic realization of the  
540 coalescent process (Hudson and Turelli 2003).

541         Several recent studies have also noted that introgression is positively correlated with local  
542 recombination rate (Nachman and Payseur 2012; Janoušek et al. 2015; Schumer et al. 2018;  
543 Edelman et al. 2019; Li et al. 2019; Martin et al. 2019), presumably due to the effects of linked  
544 selection against deleterious mutations in hybrids. If this relationship generally holds, then it is  
545 possible that our dating approach based on the distribution of introgression tract lengths is also  
546 upwardly biased. However, contemporary range overlap between snowshoe hares and black-  
547 tailed jackrabbits appears restricted to relatively sharp ecological transitions between sage-scrub  
548 and montane forests in OR and CA (Fig. 2) and no records exist of putative hybrids, suggesting  
549 that contemporary hybridization is likely exceedingly rare or absent and has not resulted in  
550 discernable gene flow. Thus, the collective evidence suggests that historical hybridization  
551 between snowshoe hares and black-tailed jackrabbits was not more recent than 5 thousand  
552 generations ago. Notably, the timing of genome-wide admixture, assuming 1-2 generations per  
553 year in hares (Marboutin and Peroux 1995), appears coincident with the retreat of the Cordilleran  
554 ice sheet from low-lying coastal habitats in southern BC and northern WA at the end of the last  
555 glacial maximum (~18 thousand years ago; Darvill et al. 2018) and thus the opening of suitable  
556 habitat for winter-brown snowshoe hares. This period of rapid climatic change resulted in

557 individualistic range shifts for many North American mammal species (Graham 1986),  
558 potentially leading to novel community assemblages and thus promoting hybridization events  
559 (Swenson and Howard 2005), which could have created conditions favorable to adaptive  
560 introgression.

561

#### 562 The spread of winter-brown camouflage and the tempo of local adaptation

563         Although theory predicts adaptation in small range-edge populations may be slow and  
564 mutation-limited, hybridization may alleviate the lack of beneficial variation along range  
565 margins (Pfennig et al. 2016). Revealing how introgressed alleles adaptively spread through  
566 populations is therefore a critical component of understanding the limitations of range-edge  
567 adaptation. Here, we identified *Agouti* as one of the largest (>200 kb) and most strongly  
568 supported introgression tracts genome-wide (Fig. 4), consistent with our previous study showing  
569 exceptionally low genomic divergence in this region between black-tailed jackrabbits and  
570 winter-brown snowshoe hares (Jones et al. 2018). Assuming our genome-wide estimates of  
571 hybridization age reflect the origination of the *Agouti* allele through introgression (~9 thousand  
572 generations ago), our findings suggest a ~3-8 thousand generation delay until the selective sweep  
573 of the winter-brown haplotype in the PNW.

574         One potential biological explanation for this temporal lag is that winter-brown  
575 camouflage was not immediately beneficial in snowshoe hares. Rather, the winter-brown variant  
576 may have initially segregated as a neutral or deleterious allele for a period of time until an  
577 environmental shift allowed positive selection to act quickly on standing variation (e.g.,  
578 Colosimo et al. 2005). However, our simulations suggest that beneficial recessive alleles  
579 segregating at frequencies as high as ~10% (equivalent to simulations of 0.1% hybridization rate

580 for 100 generations) take on average ~5612 generations (95% CI: 4319-6757 generations) to  
581 reach fixation (Table 2). Thus, under an environmental shift scenario, the starting frequency of  
582 the winter-brown variant would likely have to be quite large (>10%) in order for selection to  
583 quickly drive it to fixation. Although allelic fixation under this model would be virtually  
584 guaranteed (Table 2), we suspect that such a high level of hybridization between black-tailed  
585 jackrabbits and snowshoe hares is unlikely given their ecological distinctiveness and our lower  
586 estimate of the genome-wide proportion of introgression (~1.99%). Furthermore, the high  
587 starting allele frequency needed to result in rapid fixation is at odds with the evidence that  
588 selection fixed a single haplotype, as higher hybridization rates tended to result in softer sweeps  
589 (Table 2).

590 An alternative explanation for the delayed rise in frequency of the winter-brown allele  
591 invokes the limits of positive selection on recessive variation, which is predicted to result in an  
592 extended period of drift while at low frequency until homozygous recessive genotypes become  
593 more common. Consistent with this, we find significant temporal lags between the timing of  
594 hybridization and the TMRCA of fixed beneficial recessive alleles under low and moderate rates  
595 of hybridization. Although fixation under our lowest simulated rate of hybridization was highly  
596 unlikely (~0.8%; Table 2), the two intermediate scenarios still resulted in relatively high fixation  
597 probabilities (12-78%) and tended to produce hard sweeps (81-96%), consistent with observed  
598 patterns of genetic variation at the winter-brown *Agouti* haplotype. These results demonstrate  
599 that one does not need to invoke changing selective coefficients to explain the apparent lag  
600 between the origin and the TMRCA of the winter-brown allele. Rather, our data are consistent  
601 with the winter-brown variant being immediately beneficial, although predominately hidden to  
602 selection, after introduced through hybridization at moderate frequency (~0.1-1%). Indeed, this

603 mutation-limited scenario is consistent with other known instances of colonization of novel  
604 environments through the evolution of locally adaptive camouflage in Nebraska deer mice and  
605 White Sands lizards (Laurent et al. 2016; Pfeifer et al. 2018; Harris et al. 2019).

606 Rates of adaptation at range edges are potentially an important component of species'  
607 responses to climate change (Hampe and Petit 2005). Our study highlights the key role that  
608 hybridization can play in seeding adaptive variation and facilitating range expansion during  
609 periods of environmental change. In some cases, introgression appears to facilitate rapid  
610 adaptation to environmental change (Norris et al. 2015; Oziolor et al. 2019). However,  
611 introgression may not always be an efficient solution for rapid adaptation, as here we  
612 demonstrate that the rate of adaptation to novel mild winter environments in snowshoe hares  
613 appears to have been limited by the dominance coefficient of the winter-brown allele.  
614 Collectively, our findings demonstrate key factors that promote and limit adaptation to changing  
615 environments and, in particular, highlight the importance of characterizing genetic dominance of  
616 beneficial variants for understanding rates of adaptation and range expansion under climate  
617 change.

618

## 619 **Acknowledgements**

620 We thank E. Cheng and K. Garrison for assistance with sample collection. We thank J. Melo-  
621 Ferreira, P. C. Alves, M. S. Ferreira, N. Herrera, E. Kopania, A. Kumar, M. Zimova, K.  
622 Garrison, N. Edelman, and the UNVEIL network for helpful discussions. We thank B. Kim for  
623 assistance with *Fit∂a∂i* analysis. Funding and support for this research was provided a National  
624 Science Foundation (NSF) Graduate Research Fellowship (DGE-1313190), NSF Doctoral  
625 Dissertation Improvement Grant (DGE-1702043), NSF Graduate Research Opportunities

626 Worldwide, NSF EPSCoR (OIA-1736249), and NSF (DEB-0841884), the Drollinger-Dial  
627 Foundation, American Society of Mammalogists Grant-in-aid of Research, and a Swiss  
628 Government Excellence Scholarship. Original sequence data are available in the Sequence Read  
629 Archive ([www.ncbi.nlm.nih.gov/sra](http://www.ncbi.nlm.nih.gov/sra)). Previously generated whole exome and genome sequence  
630 data of snowshoe hare (BioProject PRJNA420081, SAMN02782769, SAMN07526959) are also  
631 available in the Sequence Read Archive.

632

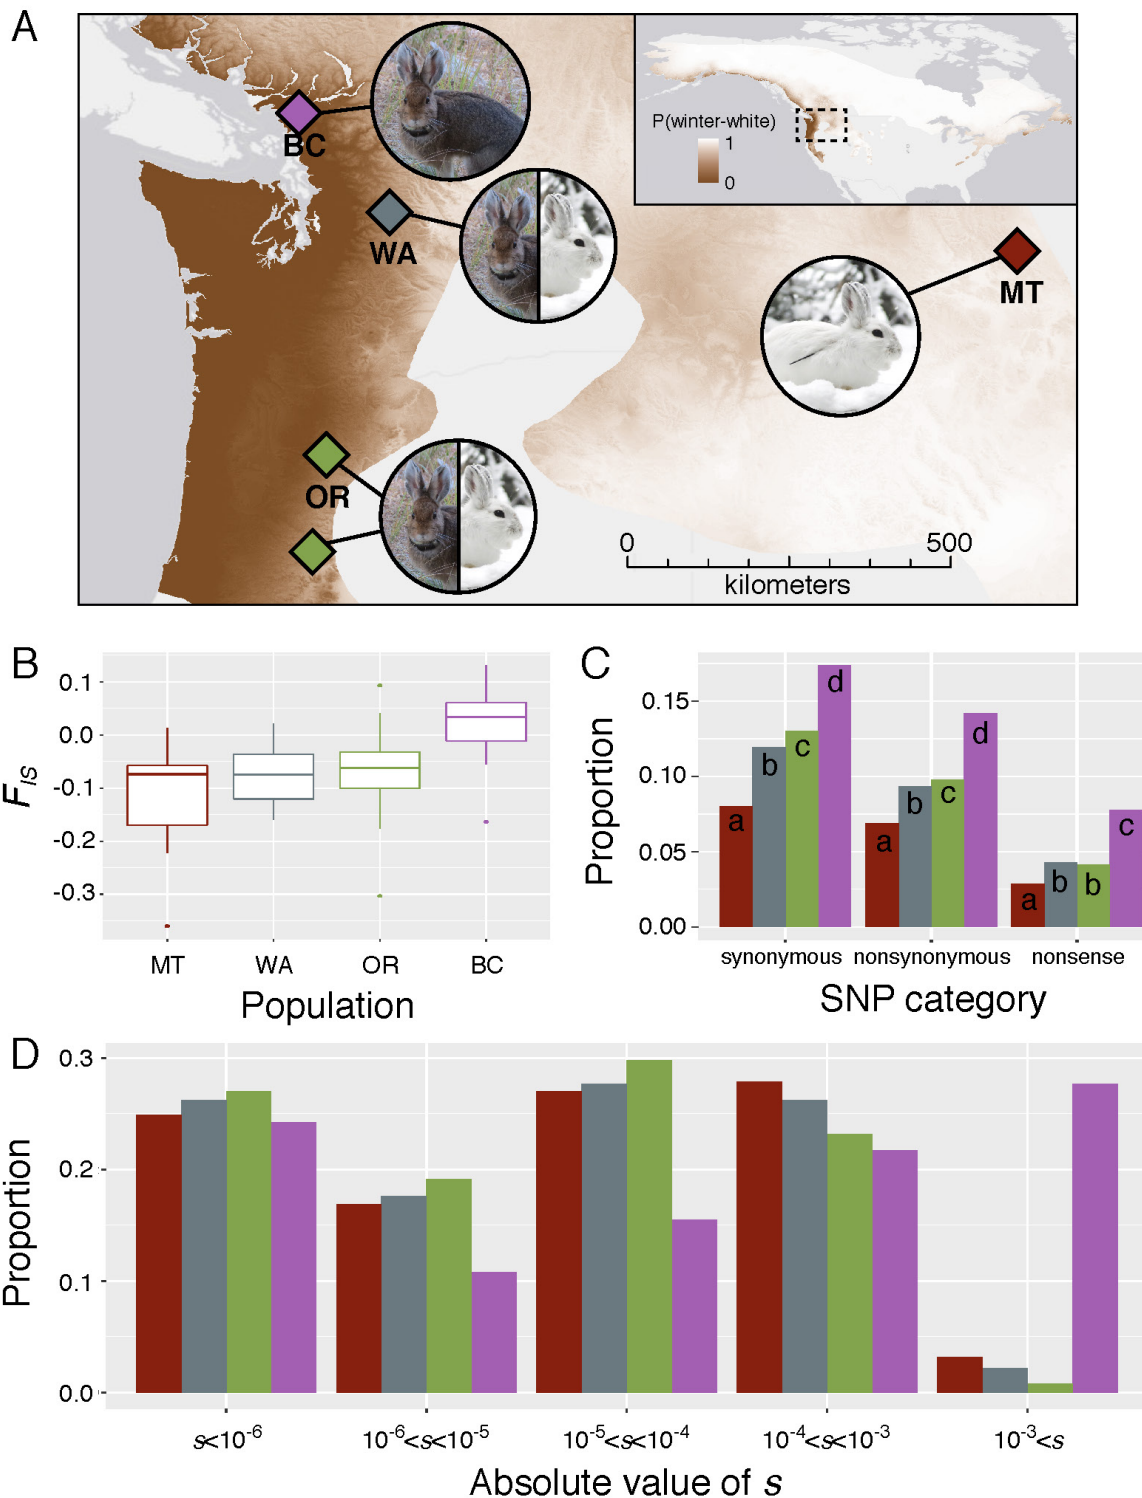

633

634 **Figure 1.** (A) Snowshoe hare range map colored by the probability of winter-white camouflage

635 (white=1, brown=0). The Pacific Northwest region is magnified and shows sampling localities

636 and coat color phenotypes for BC (purple), MT (red), OR (green), and WA (blue) populations  
637 used to generate whole exome data. **(B)** Box-and-whisker plots representing distributions of  
638 individual inbreeding coefficients ( $F_{IS}$ ) within each population. **(C)** The proportion of  
639 homozygosity across PNW populations for SNPs classified as synonymous, nonsynonymous  
640 (missense), or nonsense. Different letters denote significant differences between populations  
641 ( $p < 0.01$ ). **(D)** The inferred distribution of fitness effects for each population shown as the  
642 proportion of mutations with given selection coefficients.

643

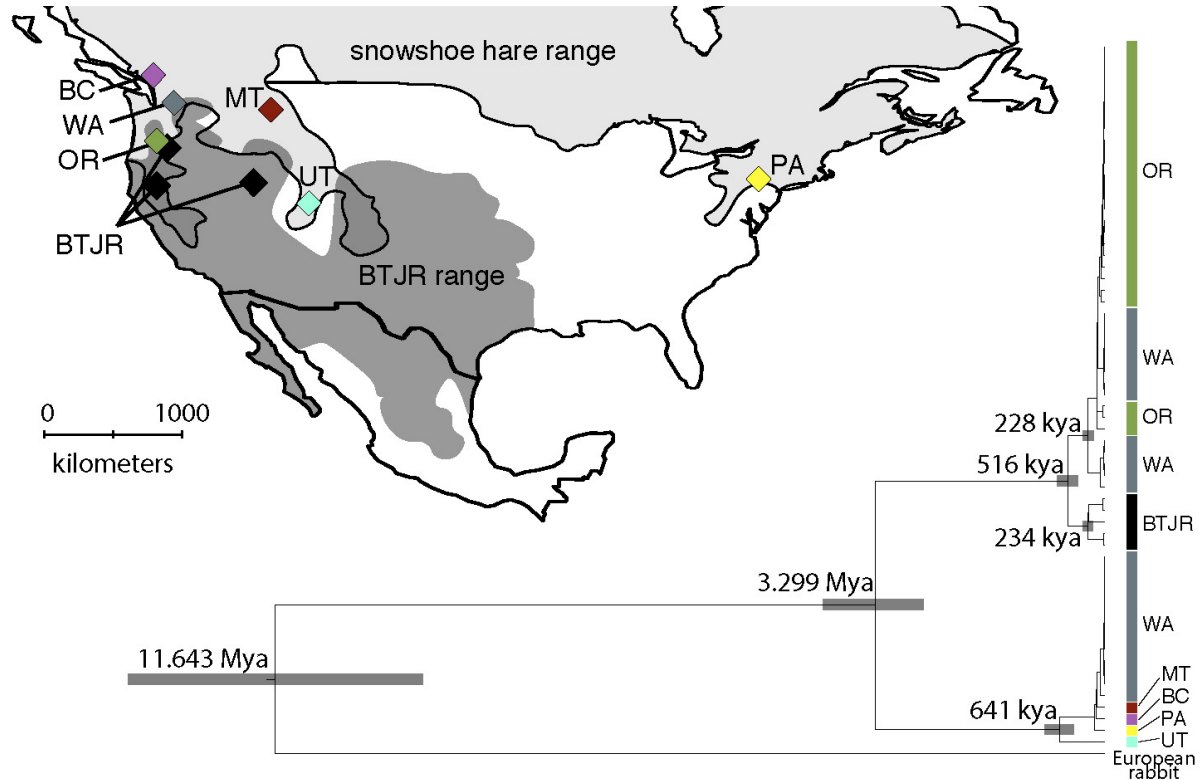

644

645 **Figure 2.** Snowshoe hare and black-tailed jackrabbit (BTJR) ranges with sampling localities for  
646 whole genome sequencing. The phylogenetic tree is a maximum clade credibility tree based on  
647 whole mitochondrial genome assemblies of snowshoe hares and black-tailed jackrabbits  
648 (European rabbit as outgroup) with median estimated split times for crucial nodes. Sample  
649 locality names and colors correspond to those on the map. Gray rectangles show the 95% highest  
650 posterior density (HPD) for each node age estimate.



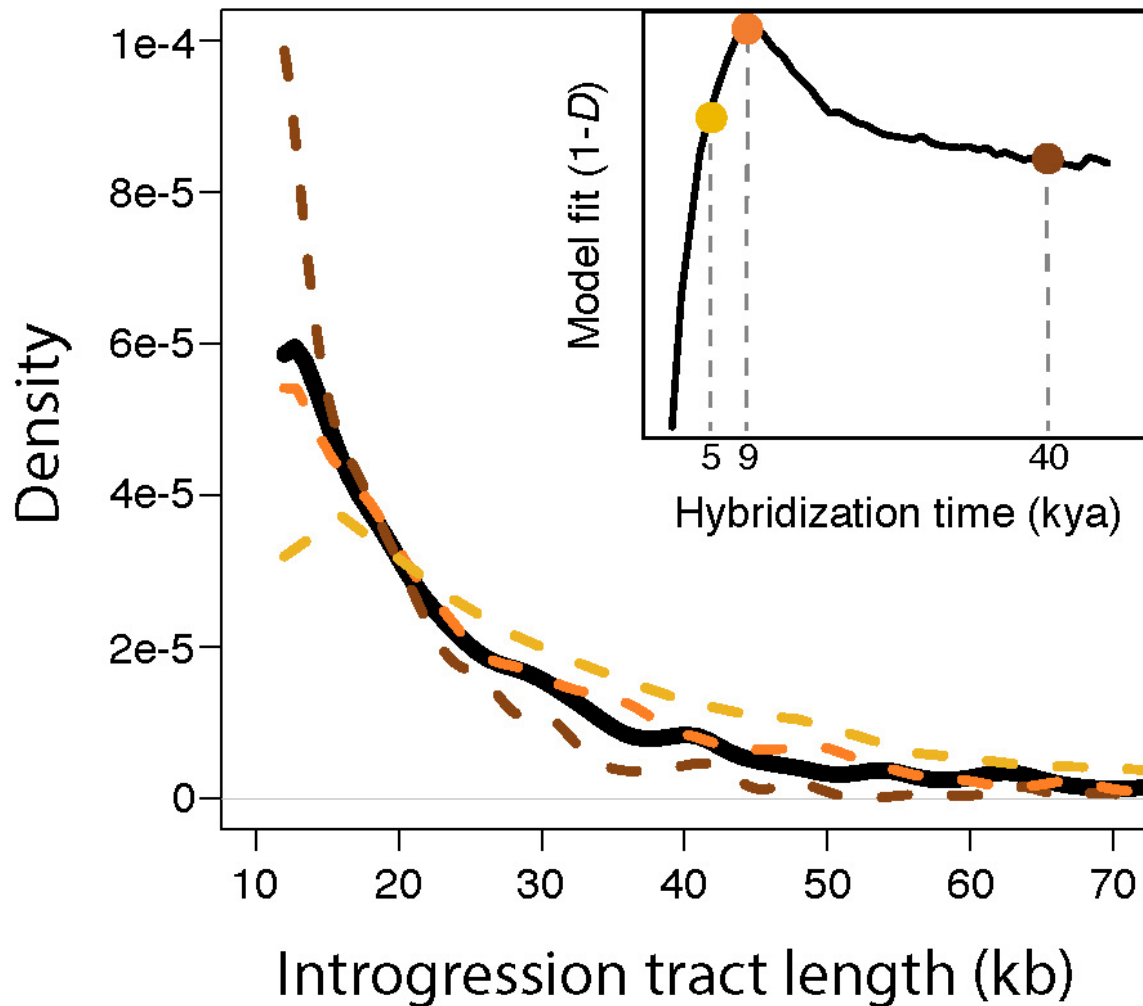

651

652 **Figure 3.** Empirical and simulated distributions of introgression tract lengths. The black line  
653 shows the empirical distribution of genome-wide introgression tract lengths in snowshoe hares.  
654 Colored dashed lines show simulated tract length distributions at three time points following a  
655 100 generation pulse of hybridization at 0.1% frequency (yellow= 5 kya, orange=9 kya,  
656 brown=40 kya). The inset figure shows the overall fit of simulated introgression tract lengths to  
657 the empirical distribution through time, with hybridization occurring 9 kya as the model with the  
658 strongest fit (95% confidence intervals: 8-10.5 kya).

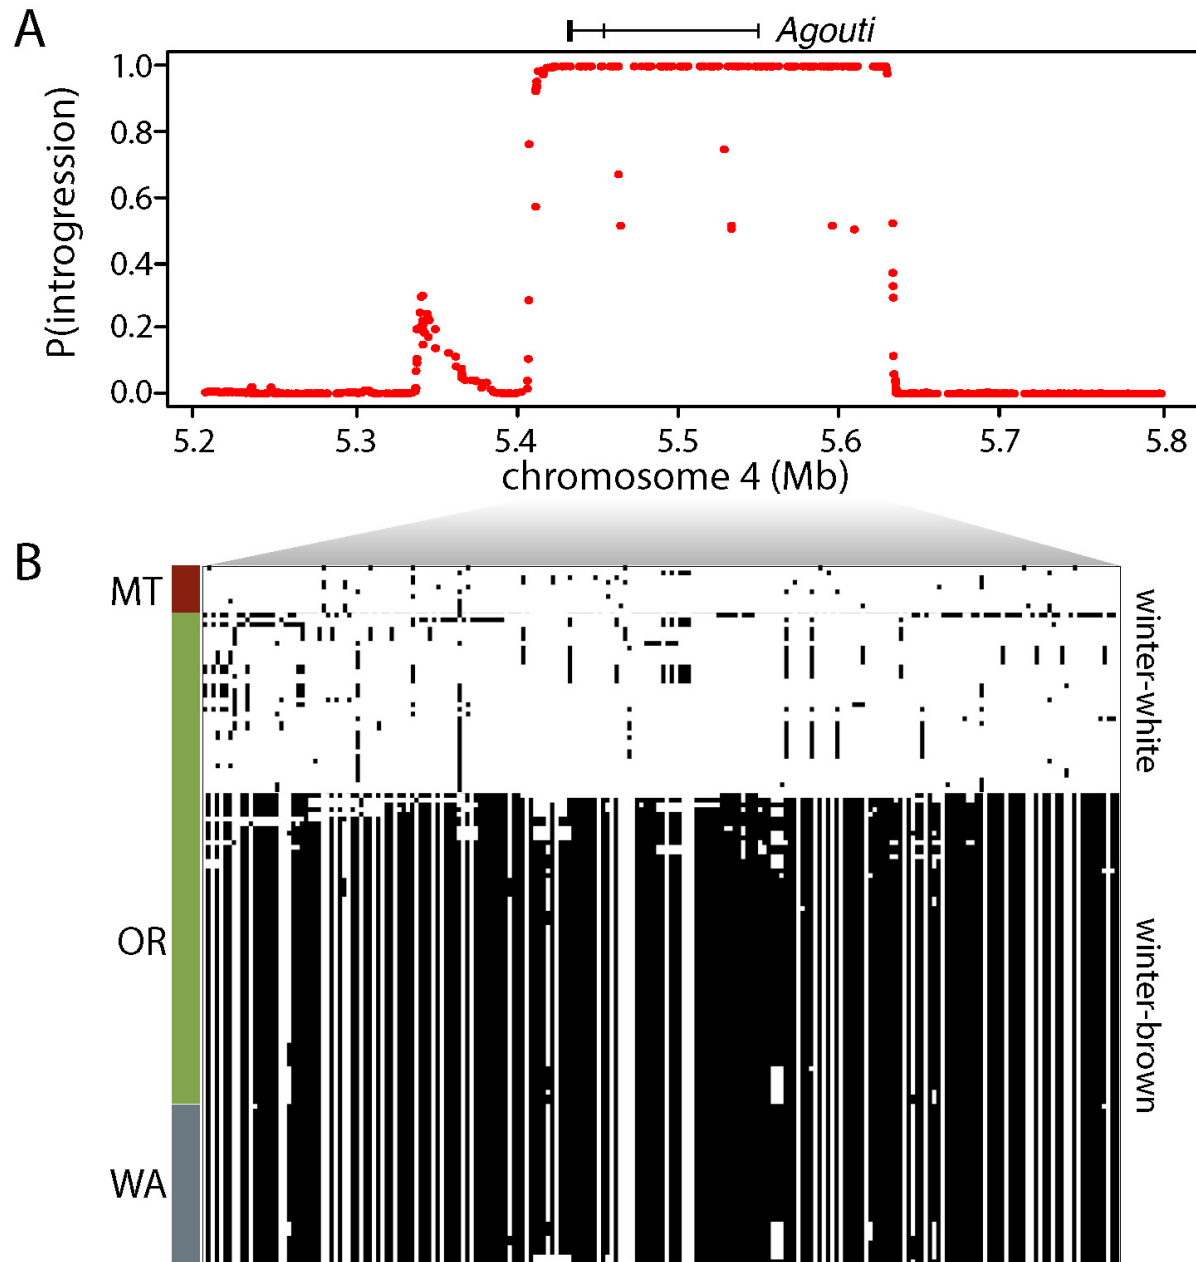

659

660 **Figure 4.** (A) Phylonet-HMM classification of the probability of introgression for each variable  
661 position across the *Agouti* locus. (B) Haplotype structure across the inferred introgressed *Agouti*  
662 interval (chr4:5424111-5633123) for winter-white and winter-brown PNW snowshoe hares.

663

664

665 **Table 1. Maximum likelihood demographic model parameter estimates.**

| Population | Model          | $N_{anc}$       | $N_B$              | $N_F$           | $t$ (generations) |
|------------|----------------|-----------------|--------------------|-----------------|-------------------|
| MT         | Inst. change + | 459809          | 8121810            | 245430          | 129400            |
|            | exp. growth    | (450035-469582) | (5984297-10344665) | (197252-295473) | (98087-161953)    |
| BC         | Two-epoch      | 669265          | 210484             | -               | 97853             |
|            |                | (662769-675760) | (184353-237086)    |                 | (70702-125517)    |
| WA         | Two-epoch      | 509979          | 161654             | -               | 24357             |
|            |                | (503464-516493) | (125444-198747)    |                 | (20061-28755)     |
| OR         | Two-epoch      | 494903          | 257219             | -               | 52540             |
|            |                | (482587-507220) | (191394-326076)    |                 | (44017-61431)     |

666 Values in parentheses are the 95% confidence intervals.  $N_{anc}$  = population size of common

667 ancestor;  $N_B$  = population size following instantaneous change at time  $t$ .  $N_F$  is the population size

668 following an exponential change beginning immediately after time  $t$ .

669 **Table 2. Results from simulations of positive selection on recessive variation.**

|                        | 1 generation pulse       |                      | 100 generation pulse |                     |
|------------------------|--------------------------|----------------------|----------------------|---------------------|
|                        | 0.01%                    | 0.1%                 | 0.01%                | 0.1%                |
| $P(\text{fixation})$   | 0.0082<br>(0.0068-0.010) | 0.12<br>(0.098-0.13) | 0.79<br>(0.71-0.85)  | 1.0<br>(0.96-1.0)   |
| $P(\text{hard sweep})$ | 0.98<br>(0.93-0.99)      | 0.81<br>(0.72-0.87)  | 0.96<br>(0.90-0.98)  | 0.38<br>(0.29-0.48) |
| $T(\text{sojourn})$    | 8911<br>(5179-16208)     | 9448<br>(5626-15746) | 6472<br>(5088-15339) | 5612<br>(4319-6757) |
| $T(\text{lag})$        | 2140<br>(101-8322)       | 2514<br>(97-7740)    | 1587<br>(87-7253)    | 624<br>(91-1899)    |

670 The beneficial variant was introduced through hybridization during a 1 or 100 generation pulse at  
671 a rate of 0.01% or 0.1%. Data are shown for the probability of fixation ( $P(\text{fixation})$ ), and,  
672 conditional on fixation, the probability of a hard selective sweep ( $P(\text{hard sweep})$ ), the mean  
673 sojourn time ( $T(\text{sojourn})$ ), and the mean lag time between a fixed mutation's origin and TMRCA  
674 ( $T(\text{lag})$ ). In parentheses are 95% confidence intervals.

675 **References**

- 676
- 677 Ackerly, D. D. 2003. Community assembly, niche conservatism, and adaptive evolution in  
678 changing environments. *International Journal of Plant Sciences* 164:S165–S184.
- 679 Akashi, H. 1994. Synonymous codon usage in *Drosophila melanogaster*: natural selection and  
680 translational accuracy. *Genetics* 136:927–935.
- 681 Antonovics, J. 1976. The nature of limits to natural selection. *Annals of the Missouri Botanical*  
682 *Garden* 63:224–247.
- 683 Arbogast, B. S., S. V. Edwards, J. Wakeley, P. Beerli, and J. B. Slowinski. 2002. Estimating  
684 divergence times from molecular data on phylogenetic and population genetic timescales.  
685 *Annual Review of Ecology and Systematics* 33:707–740.
- 686 Assaf, Z. J., D. A. Petrov, and J. R. Blundell. 2015. Obstruction of adaptation in diploids by  
687 recessive, strongly deleterious alleles. *Proceedings of the National Academy of Sciences*  
688 *of the United States of America* 112:E2658–66.
- 689 Baker, H. G. 1948. Stages in invasion and replacement demonstrated by species of *Melandrium*.  
690 *The Journal of Ecology* 36:96–119.
- 691 Barton, N. 2001. Adaptation at the edge of a species' range. Pages 365–392 in J. Silvertown and  
692 J. Antonovics, eds. *Integrating ecology and evolution in a spatial context*. Blackwell  
693 Science.
- 694 Behrman, K. D., and M. Kirkpatrick. 2011. Species range expansion by beneficial mutations.  
695 *Journal of Evolutionary Biology* 24:665–675.
- 696 Beichman, A. C., E. Huerta-Sanchez, and K. E. Lohmueller. 2018. Using genomic data to infer  
697 historic population dynamics of nonmodel organisms. *Annual Review of Ecology,*  
698 *Evolution, and Systematics* 49:433–56.
- 699 Besansky, N. J., J. Krzywinski, T. Lehmann, F. Simard, M. Kern, O. Mukabayire, D. Fontenille,  
700 et al. 2003. Semipermeable species boundaries between *Anopheles gambiae* and  
701 *Anopheles arabiensis*: evidence from multilocus DNA sequence variation. *Proceedings of*  
702 *the National Academy of Sciences of the United States of America* 100:10818–23.
- 703 Bolger, A. M., M. Lohse, and B. Usadel. 2014. Trimmomatic: a flexible trimmer for Illumina  
704 sequence data. *Bioinformatics* 30:2114–2120.
- 705 Bontrager, M., and A. L. Angert. 2019. Gene flow improves fitness at a range edge under climate  
706 change. *Evolution Letters* 3:55–68.
- 707 Bosshard, L., I. Dupanloup, O. Tenaillon, R. Bruggmann, M. Ackermann, S. Peischl, and L.  
708 Excoffier. 2017. Accumulation of deleterious mutations during bacterial range  
709 expansions. *Genetics* 207:669–684.
- 710 Bouckaert, R., J. Heled, D. Kühnert, T. Vaughan, C.-H. Wu, D. Xie, M. A. Suchard, et al. 2014.  
711 BEAST 2: a software platform for bayesian evolutionary analysis. *PLoS Computational*  
712 *Biology* 10:e1003537.
- 713 Bridle, J. R., and T. H. Vines. 2007. Limits to evolution at range margins: when and why does  
714 adaptation fail? *Trends in Ecology & Evolution* 22:140–147.
- 715 Browning, S. R., and B. L. Browning. 2007. Rapid and accurate haplotype phasing and missing-  
716 data inference for whole-genome association studies by use of localized haplotype  
717 clustering. *The American Journal of Human Genetics* 81:1084–1097.
- 718 Burke, J. M., and M. L. Arnold. 2001. Genetics and the fitness of hybrids. *Annual Review of*  
719 *Genetics* 35:31–52.
- 720 Carneiro, M., S. Afonso, A. Geraldes, H. Garreau, G. Bolet, S. Boucher, A. Tircazes, et al. 2011.

- 721 The genetic structure of domestic rabbits. *Molecular Biology and Evolution* 28:1801–  
722 1816.
- 723 Carneiro, M., F. W. Albert, J. Melo-Ferreira, N. Galtier, P. Gayral, J. A. Blanco-Aguiar, R.  
724 Villafuerte, et al. 2012. Evidence for widespread positive and purifying selection across  
725 the European rabbit (*Oryctolagus cuniculus*) genome. *Molecular Biology and Evolution*  
726 29:1837–1849.
- 727 Carneiro, M., C.-J. Rubin, F. Di Palma, F. W. Albert, J. Alföldi, A. Martinez Barrio, G. Pielberg,  
728 et al. 2014. Rabbit genome analysis reveals a polygenic basis for phenotypic change  
729 during domestication. *Science* 345:1074–1079.
- 730 Cheng, E., K. E. Hodges, J. Melo-Ferreira, P. C. Alves, and L. S. Mills. 2014. Conservation  
731 implications of the evolutionary history and genetic diversity hotspots of the snowshoe  
732 hare. *Molecular Ecology* 23:2929–2942.
- 733 Cingolani, P., A. Platts, L. L. Wang, M. Coon, T. Nguyen, L. Wang, S. J. Land, et al. 2012. A  
734 program for annotating and predicting the effects of single nucleotide polymorphisms,  
735 SnpEff: SNPs in the genome of *Drosophila melanogaster* strain w1118; iso-2; iso-3. *Fly*  
736 6:80–92.
- 737 Coffman, A. J., P. H. Hsieh, S. Gravel, and R. N. Gutenkunst. 2016. Computationally efficient  
738 composite likelihood statistics for demographic inference. *Molecular Biology and*  
739 *Evolution* 33:591–593.
- 740 Colosimo, P. F., K. E. Hosemann, S. Balabhadra, G. Villarreal, M. Dickson, J. Grimwood, J.  
741 Schmutz, et al. 2005. Widespread parallel evolution in sticklebacks by repeated fixation  
742 of *Ectodysplasin* alleles. *Science* 307:1928–1933.
- 743 Corbett-Detig, R., and M. Jones. 2016. SELAM: simulation of epistasis and local adaptation  
744 during admixture with mate choice. *Bioinformatics* 32:3035–3037.
- 745 Danecek, P., A. Auton, G. Abecasis, C. A. Albers, E. Banks, M. A. DePristo, R. E. Handsaker, et  
746 al. 2011. The variant call format and VCFtools. *Bioinformatics* 27:2156–2158.
- 747 Darvill, C. M., B. Menounos, B. M. Goehring, O. B. Lian, and M. W. Caffee. 2018. Retreat of  
748 the western Cordilleran Ice Sheet margin during the last deglaciation. *Geophysical*  
749 *Research Letters* 45:9710–9720.
- 750 Dierckxsens, N., P. Mardulyn, and G. Smits. 2017. NOVOPlasty: de novo assembly of organelle  
751 genomes from whole genome data. *Nucleic Acids Research* 45:e18.
- 752 Durrett, R., and J. Schweinsberg. 2005. A coalescent model for the effect of advantageous  
753 mutations on the genealogy of a population. *Stochastic Processes and their Applications*  
754 115:1628–1657.
- 755 Edelman, N. B., P. B. Frandsen, M. Miyagi, B. J. Clavijo, J. Davey, R. Dikow, G. Garcia-  
756 Accinelli, et al. 2019. Genomic architecture and introgression shape a butterfly radiation.  
757 *Science* 366:594–599.
- 758 Ewing, G. B., and J. D. Jensen. 2016. The consequences of not accounting for background  
759 selection in demographic inference. *Molecular Ecology* 25:135–141.
- 760 Forsman, A. 2016. Is colour polymorphism advantageous to populations and species? *Molecular*  
761 *Ecology* 25:2693–2698.
- 762 Frankham, R. 1998. Inbreeding and extinction: island populations. *Conservation Biology*  
763 12:665–675.
- 764 Garcia-Ramos, G., and M. Kirkpatrick. 1997. Genetic models of adaptation and gene flow in  
765 peripheral populations. *Evolution* 51:21–28.
- 766 Gigliotti, L. C., D. R. Diefenbach, and M. J. Sheriff. 2017. Geographic variation in winter

- 767 adaptations of snowshoe hares (*Lepus americanus*). *Canadian Journal of Zoology*  
768 95:539–545.
- 769 Gilbert, K. J., S. Peischl, and L. Excoffier. 2018. Mutation load dynamics during  
770 environmentally-driven range shifts. *PLOS Genetics* 14:e1007450.
- 771 Gilbert, K. J., N. P. Sharp, A. L. Angert, G. L. Conte, J. A. Draghi, F. Guillaume, A. L.  
772 Hargreaves, et al. 2017. Local adaptation interacts with expansion load during range  
773 expansion: maladaptation reduces expansion load. *The American Naturalist* 189:368–  
774 380.
- 775 Gilbert, K., and M. C. Whitlock. 2016. The genetics of adaptation to discrete heterogeneous  
776 environments: frequent mutation or large-effect alleles can allow range expansion.  
777 *Journal of Evolutionary Biology* 30:591–602.
- 778 González-Martínez, S. C., K. Ridout, and J. R. Pannell. 2017. Range expansion compromises  
779 adaptive evolution in an outcrossing plant. *Current Biology* 27:2544–2551.
- 780 Graham, R. W. 1986. Response of mammalian communities to environmental changes during the  
781 late Quaternary. Pages 300–313 in D. J. and C. T. J., eds. *Community Ecology*. Harper &  
782 Row, New York.
- 783 Graignic, N., F. Tremblay, and Y. Bergeron. 2018. Influence of northern limit range on genetic  
784 diversity and structure in a widespread North American tree, sugar maple (*Acer*  
785 *saccharum* Marshall). *Ecology and Evolution* 8:2766–2780.
- 786 Griffin, P. C., and L. S. Mills. 2009. Sinks without borders: Snowshoe hare dynamics in a  
787 complex landscape. *Oikos* 118:1487–1498.
- 788 Gutenkunst, R. N., R. D. Hernandez, S. H. Williamson, and C. D. Bustamante. 2009. Inferring  
789 the joint demographic history of multiple populations from multidimensional SNP  
790 frequency data. *PLoS Genetics* 5:e1000695.
- 791 Haldane, J. B. S. 1924. A mathematical theory of natural and artificial selection Part I.  
792 *Transactions of the Cambridge Philosophical Society* 23:19–41.
- 793 ———. 1930. A mathematical theory of natural and artificial selection (Part VI, Isolation).  
794 *Mathematical Proceedings of the Cambridge Philosophical Society* 26:220–230.
- 795 Haller, B. C., J. Galloway, J. Kelleher, P. W. Messer, and P. L. Ralph. 2019. Tree-sequence  
796 recording in SLiM opens new horizons for forward-time simulations of whole genomes.  
797 *Molecular Ecology Resources* 19:552–566.
- 798 Haller, B. C., and P. W. Messer. 2019. SLiM 3: Forward genetic simulations beyond the Wright-  
799 Fisher model. *Molecular Biology and Evolution* 36:632–637.
- 800 Hampe, A., and R. J. Petit. 2005. Conserving biodiversity under climate change: the rear edge  
801 matters. *Ecology Letters* 8:461–467.
- 802 Harris, R. B., K. Irwin, M. R. Jones, S. Laurent, R. D. H. Barrett, R. D. H. Nachman, J. M. Good,  
803 et al. 2019. The population genetics of crypsis in vertebrates: recent insights from mice,  
804 hares, and lizards. *Heredity* doi:10.1038/s41437-019-0257-4.
- 805 Hedrick, P. W. 2013. Adaptive introgression in animals: examples and comparison to new  
806 mutation and standing variation as sources of adaptive variation. *Molecular Ecology*  
807 22:4606–4618.
- 808 Henn, B. M., L. R. Botigué, S. Peischl, I. Dupanloup, M. Lipatov, B. K. Maples, A. R. Martin, et  
809 al. 2016. Distance from sub-Saharan Africa predicts mutational load in diverse human  
810 genomes. *Proceedings of the National Academy of Sciences of the United States of*  
811 *America* 113:E440-9.
- 812 Hill, J. K., H. M. Griffiths, and C. D. Thomas. 2011. Climate change and evolutionary

- 813 adaptations at species' range margins. *Annual Review of Entomology* 56:143–159.
- 814 Holt, R. D., and R. Gomulkiewicz. 1997. How does immigration influence local adaptation? A  
815 reexamination of a familiar paradigm. *The American Naturalist* 149:563–572.
- 816 Hudson, R. R., and M. Turelli. 2003. Stochasticity overrules the “three-times rule”: genetic drift,  
817 genetic draft, and coalescence times for nuclear loci versus mitochondrial DNA.  
818 *Evolution* 57:182–190.
- 819 Huerta-Sánchez, E., X. Jin, Asan, Z. Bianba, B. M. Peter, N. Vinckenbosch, Y. Liang, et al.  
820 2014. Altitude adaptation in Tibetans caused by introgression of Denisovan-like DNA.  
821 *Nature* 512:194–197.
- 822 Janoušek, V., P. Munclinger, L. Wang, K. C. Teeter, and P. K. Tucker. 2015. Functional  
823 organization of the genome may shape the species boundary in the house mouse.  
824 *Molecular Biology and Evolution* 32:1208–1220.
- 825 Jones, M. R., L. S. Mills, P. C. Alves, C. M. Callahan, J. M. Alves, D. J. R. Lafferty, F. M.  
826 Jiggins, et al. 2018. Adaptive introgression underlies polymorphic seasonal camouflage  
827 in snowshoe hares. *Science* 360:1355–1358.
- 828 Kawecki, T. J. 2008. Adaptation to marginal habitats. *Annual Review of Ecology, Evolution, and*  
829 *Systematics* 39:321–342.
- 830 Keightley, P. D., and A. Eyre-Walker. 2010. What can we learn about the distribution of fitness  
831 effects of new mutations from DNA sequence data? *Philosophical Transactions of the*  
832 *Royal Society B: Biological Sciences* 365:1187–93.
- 833 Kelleher, J., A. M. Etheridge, and G. McVean. 2016. Efficient coalescent simulation and  
834 genealogical analysis for large sample sizes. *PLOS Computational Biology* 12:e1004842.
- 835 Kelley, J. L. 2012. Systematic underestimation of the age of selected alleles. *Frontiers in*  
836 *Genetics* 3:165.
- 837 Kim, B. Y., C. D. Huber, and K. E. Lohmueller. 2017. Inference of the distribution of selection  
838 coefficients for new nonsynonymous mutations using large samples. *Genetics* 206:345–  
839 361.
- 840 Kirkpatrick, M., and N. H. Barton. 1997. Evolution of a species' range. *The American Naturalist*  
841 150:1–23.
- 842 Lamichhaney, S., J. Berglund, M. S. Almén, K. Maqbool, M. Grabherr, A. Martinez-Barrio, M.  
843 Promerová, et al. 2015. Evolution of Darwin's finches and their beaks revealed by  
844 genome sequencing. *Nature* 518:371–375.
- 845 Larkin, M. A., G. Blackshields, N. P. Brown, R. Chenna, P. A. McGettigan, H. McWilliam, F.  
846 Valentin, et al. 2007. Clustal W and Clustal X version 2.0. *Bioinformatics* 23:2947–2948.
- 847 Laurent, S., S. P. Pfeifer, M. L. Settles, S. S. Hunter, K. M. Hardwick, L. Ormond, V. C. Sousa,  
848 et al. 2016. The population genomics of rapid adaptation: disentangling signatures of  
849 selection and demography in white sands lizards. *Molecular Ecology* 25:306–323.
- 850 Lewontin, R. C., and L. C. Birch. 1966. Hybridization as a source of variation for adaptation to  
851 new environments. *Evolution* 20:315–336.
- 852 Li, G., H. V Figueiró, E. Eizirik, and W. J. Murphy. 2019. Recombination-aware phylogenomics  
853 reveals the structured genomic landscape of hybridizing cat species. *Molecular Biology*  
854 *and Evolution* 36:2111–2126.
- 855 Li, H. 2013. Aligning sequence reads, clone sequences and assembly contigs with BWA-MEM.  
856 arXiv 1303.3997.
- 857 Liu, K. J., J. Dai, K. Truong, Y. Song, M. H. Kohn, and L. Nakhleh. 2014. An HMM-based  
858 comparative genomic framework for detecting introgression in eukaryotes. *PLoS*



- 859 Computational Biology 10:e1003649.
- 860 Loh, P.-R., M. Lipson, N. Patterson, P. Moorjani, J. K. Pickrell, D. Reich, and B. Berger. 2013.
- 861 Inferring admixture histories of human populations using linkage disequilibrium.
- 862 Genetics 193:1233–1254.
- 863 Lynch, M., J. Conery, and R. Burger. 1995. Mutation accumulation and the extinction of small
- 864 populations. The American Naturalist 146:489–518.
- 865 Magoč, T., and S. L. Salzberg. 2011. FLASH: fast length adjustment of short reads to improve
- 866 genome assemblies. Bioinformatics 27:2957–2963.
- 867 Marboutin, E., and R. Peroux. 1995. Survival pattern of European hare in a decreasing
- 868 population. The Journal of Applied Ecology 32:809–816.
- 869 Marnetto, D., and E. Huerta-Sánchez. 2017. Haplostrips: revealing population structure through
- 870 haplotype visualization. Methods in Ecology and Evolution 8:1389–1392.
- 871 Martin, S. H., J. Davey, C. Salazar, and C. Jiggins. 2019. Recombination rate variation shapes
- 872 barriers to introgression across butterfly genomes. PLoS Biology 17:e2006288.
- 873 Massey, F. J. 1951. The Kolmogorov-Smirnov test for goodness of fit. Journal of the American
- 874 Statistical Association 46:68–78.
- 875 Matthee, C. A., B. J. Van Vuuren, D. Bell, and T. J. Robinson. 2004. A molecular supermatrix of
- 876 the rabbits and hares (Leporidae) allows for the identification of five intercontinental
- 877 exchanges during the Miocene. Systematic Biology 53:433–447.
- 878 McKenna, A., M. Hanna, E. Banks, A. Sivachenko, K. Cibulskis, A. Kernytsky, K. Garimella, et
- 879 al. 2010. The Genome Analysis Toolkit: A MapReduce framework for analyzing next-
- 880 generation DNA sequencing data. Genome Research 20:1297–1303.
- 881 Melo-Ferreira, J., F. A. Seixas, E. Cheng, L. S. Mills, and P. C. Alves. 2014. The hidden history
- 882 of the snowshoe hare, *Lepus americanus*: extensive mitochondrial DNA introgression
- 883 inferred from multilocus genetic variation. Molecular Ecology 23:4617–4630.
- 884 Meyer, M., and M. Kircher. 2010. Illumina sequencing library preparation for highly multiplexed
- 885 target capture and sequencing. Cold Spring Harbor Protocols 5:pdb.prot5448.
- 886 Miao, B., Z. Wang, and Y. Li. 2016. Genomic analysis reveals hypoxia adaptation in the Tibetan
- 887 Mastiff by introgression of the Grey Wolf from the Tibetan Plateau. Molecular Biology
- 888 and Evolution 34:734–743.
- 889 Mills, L. S., E. V Bragina, A. V Kumar, M. Zimova, D. J. R. Lafferty, J. Feltner, B. M. Davis, et
- 890 al. 2018. Winter color polymorphisms identify global hot spots for evolutionary rescue
- 891 from climate change. Science 359:1033–1036.
- 892 Mills, L. S., and P. E. Smouse. 1994. Demographic consequences of inbreeding in remnant
- 893 populations. The American Naturalist 144:412–431.
- 894 Mills, L. S., M. Zimova, J. Oyler, S. Running, J. T. Abatzoglou, and P. M. Lukacs. 2013.
- 895 Camouflage mismatch in seasonal coat color due to decreased snow duration.
- 896 Proceedings of the National Academy of Sciences of the United States of America
- 897 110:7360–7365.
- 898 Moeller, D. A., M. A. Geber, and P. Tiffin. 2011. Population genetics and the evolution of
- 899 geographic range limits in an annual plant. The American Naturalist 178:S44–61.
- 900 Nachman, M. W., and B. A. Payseur. 2012. Recombination rate variation and speciation:
- 901 theoretical predictions and empirical results from rabbits and mice. Philosophical
- 902 Transactions of the Royal Society B: Biological Sciences 367:409–421.
- 903 Nagorsen, D. W. 1983. Winter pelage colour in snowshoe hares (*Lepus americanus*) from the
- 904 Pacific Northwest. Canadian Journal of Zoology 61:2313–2318.

- 905 Nelson, T. C., M. R. Jones, J. P. Velotta, A. S. Dhawanjewar, and R. M. Schweizer. 2019.  
906 UNVEILing connections between genotype, phenotype, and fitness in natural  
907 populations. *Molecular Ecology* 28:1866–1876.
- 908 Norris, L. C., B. J. Main, Y. Lee, T. C. Collier, A. Fofana, A. J. Cornel, and G. C. Lanzaro. 2015.  
909 Adaptive introgression in an African malaria mosquito coincident with the increased  
910 usage of insecticide-treated bed nets. *Proceedings of the National Academy of Sciences*  
911 of the United States of America 112:815–20.
- 912 Orr, H. A., and A. J. Betancourt. 2001. Haldane’s sieve and adaptation from the standing genetic  
913 variation. *Genetics* 157:875–884.
- 914 Oziolor, E. M., N. M. Reid, S. Yair, K. M. Lee, S. Guberman VerPloeg, P. C. Bruns, J. R. Shaw,  
915 et al. 2019. Adaptive introgression enables evolutionary rescue from extreme  
916 environmental pollution. *Science* 364:455–457.
- 917 Pardo-Diaz, C., C. Salazar, S. W. Baxter, C. Merot, W. Figueiredo-Ready, M. Joron, W. O.  
918 McMillan, et al. 2012. Adaptive introgression across species boundaries in *Heliconius*  
919 butterflies. *PLoS Genetics* 8:e1002752.
- 920 Peischl, S., I. Dupanloup, M. Kirkpatrick, and L. Excoffier. 2013. On the accumulation of  
921 deleterious mutations during range expansions. *Molecular Ecology* 22:5972–5982.
- 922 Peischl, S., M. Kirkpatrick, and L. Excoffier. 2015. Expansion load and the evolutionary  
923 dynamics of a species range. *The American Naturalist* 185:E81–E93.
- 924 Pfeifer, S. P., S. Laurent, V. C. Sousa, C. R. Linnen, M. Foll, L. Excoffier, H. E. Hoekstra, et al.  
925 2018. The evolutionary history of Nebraska deer mice: local adaptation in the face of  
926 strong gene flow. *Molecular Biology and Evolution* 35:792–806.
- 927 Pfennig, K. S., A. L. Kelly, and A. A. Pierce. 2016. Hybridization as a facilitator of species range  
928 expansion. *Proceedings of the Royal Society B: Biological Sciences* 283:20161329.
- 929 Polechová, J. 2018. Is the sky the limit? On the expansion threshold of a species’ range. *PLoS*  
930 *Biology* 16:e2005372.
- 931 Pouyet, F., S. Aeschbacher, A. Thiéry, and L. Excoffier. 2018. Background selection and biased  
932 gene conversion affect more than 95% of the human genome and bias demographic  
933 inferences. *eLife* 7:e36317.
- 934 Pujol, B., and J. R. Pannell. 2008. Reduced responses to selection after species range expansion.  
935 *Science* 321:96.
- 936 R Core Team. 2018. R: A language and environment for statistical computing. R Foundation for  
937 Statistical Computing, Vienna, Austria.
- 938 Resch, A. M., L. Carmel, L. Mariño-Ramírez, A. Y. Ogurtsov, S. A. Shabalina, I. B. Rogozin,  
939 and E. V. Koonin. 2007. Widespread positive selection in synonymous sites of  
940 mammalian genes. *Molecular Biology and Evolution* 24:1821–1831.
- 941 Rieseberg, L. H., S.-C. Kim, R. A. Randell, K. D. Whitney, B. L. Gross, C. Lexer, and K. Clay.  
942 2007. Hybridization and the colonization of novel habitats by annual sunflowers.  
943 *Genetica* 129:149–165.
- 944 Robinson, J. D., A. J. Coffman, M. J. Hickerson, and R. N. Gutenkunst. 2014. Sampling  
945 strategies for frequency spectrum-based population genomic inference. *BMC*  
946 *Evolutionary Biology* 14:254.
- 947 Rohland, N., and D. Reich. 2012. Cost-effective, high-throughput DNA sequencing libraries for  
948 multiplexed target capture. *Genome Research* 22:939–946.
- 949 Schumer, M., R. Cui, D. L. Powell, G. G. Rosenthal, and P. Andolfatto. 2016. Ancient  
950 hybridization and genomic stabilization in a swordtail fish. *Molecular Ecology* 25:2661–

- 951 2679.
- 952 Schumer, M., C. Xu, D. L. Powell, A. Durvasula, L. Skov, C. Holland, J. C. Blazier, et al. 2018.
- 953 Natural selection interacts with recombination to shape the evolution of hybrid genomes.
- 954 Science 360:656–660.
- 955 Sgrò, C. M., A. J. Lowe, and A. A. Hoffmann. 2011. Building evolutionary resilience for
- 956 conserving biodiversity under climate change. *Evolutionary Applications* 4:326–337.
- 957 Simons, Y. B., and G. Sella. 2016. The impact of recent population history on the deleterious
- 958 mutation load in humans and close evolutionary relatives. *Current Opinion in Genetics &*
- 959 *Development* 41:150–158.
- 960 Slatyer, R. A., M. Hirst, and J. P. Sexton. 2013. Niche breadth predicts geographical range size: a
- 961 general ecological pattern. *Ecology Letters* 16:1104–1114.
- 962 Smith, J., G. Coop, M. Stephens, and J. Novembre. 2018. Estimating time to the common
- 963 ancestor for a beneficial allele. *Molecular Biology and Evolution* 35:1003–1017.
- 964 Song, Y., S. Endepols, N. Klemann, D. Richter, F.-R. Matuschka, C.-H. Shih, M. W. Nachman,
- 965 et al. 2011. Adaptive introgression of anticoagulant rodent poison resistance by
- 966 hybridization between old world mice. *Current Biology* 21:1296–1301.
- 967 Stewart, G. S., M. R. Morris, A. B. Genis, M. Szűcs, B. A. Melbourne, S. J. Tavener, and R. A.
- 968 Hufbauer. 2017. The power of evolutionary rescue is constrained by genetic load.
- 969 *Evolutionary Applications* 10:731–741.
- 970 Stoletzki, N., and A. Eyre-Walker. 2006. Synonymous codon usage in *Escherichia coli*: selection
- 971 for translational accuracy. *Molecular Biology and Evolution* 24:374–381.
- 972 Swenson, N. G., and D. J. Howard. 2005. Clustering of contact zones, hybrid zones, and
- 973 phylogeographic breaks in North America. *The American Naturalist* 166:581–591.
- 974 Taylor, S. A., and E. L. Larson. 2019. Insights from genomes into the evolutionary importance
- 975 and prevalence of hybridization in nature. *Nature Ecology and Evolution*. Nature
- 976 Publishing Group.
- 977 Teshima, K. M., and M. Przeworski. 2006. Directional positive selection on an allele of arbitrary
- 978 dominance. *Genetics* 172:713–8.
- 979 Turner, J. R. G. 1981. Adaptation and evolution in *Heliconius*: a defense of NeoDarwinism.
- 980 *Annual Review of Ecology and Systematics* 12:99–121.
- 981 Wang, J., and M. C. Whitlock. 2003. Estimating effective population size and migration rates
- 982 from genetic samples over space and time. *Genetics* 163:429–446.
- 983 Waples, R. S. 2015. Testing for Hardy-Weinberg proportions: have we lost the plot? *Journal of*
- 984 *Heredity* 106:1–19.
- 985 Willi, Y., M. Fracassetti, S. Zoller, and J. Van Buskirk. 2018. Accumulation of mutational load
- 986 at the edges of a species range. *Molecular Biology and Evolution* 35:781–791.
- 987 Wright, S. 1931. Evolution in Mendelian populations. *Genetics* 16:97–159.
- 988 Zheng, Y., R. Peng, M. Kuro-o, and X. Zeng. 2011. Exploring patterns and extent of bias in
- 989 estimating divergence time from mitochondrial DNA sequence data in a particular
- 990 lineage: a case study of salamanders (Order Caudata). *Molecular Biology and Evolution*.
- 991 Narnia.
- 992 Zimova, M., L. S. Mills, and J. J. Nowak. 2016. High fitness costs of climate change-induced
- 993 camouflage mismatch. *Ecology Letters* 19:299–307.
- 994
